# Supplementary material for: Homotypic NK cell-to-cell communication controls cytokine responsiveness of innate immune NK cells
Source: PubMed Central journal article supplement — Sci Rep. 2014 Dec 5;4:7157. doi: 10.1038/srep07157 (PMC4256668; doi:10.1038/srep07157), 2014-12-05
Supplement: srep07157-s1.pdf [file srep07157-s1.pdf]

## Homotypic NK cell-to-cell communication controls cytokine responsiveness of innate immune NK cells

Tae-Jin Kim<sup>1,\*</sup>, Miju Kim<sup>2,3,\*</sup>, Hye Mi Kim<sup>4</sup>, Seon Ah Lim<sup>1</sup>, Eun-Ok Kim<sup>1</sup>, Kwanghee Kim<sup>1</sup>, Kwang Hoon Song<sup>3</sup>, Jiyoung Kim<sup>1</sup>, Vinay Kumar<sup>5</sup>, Cassian Yee<sup>6</sup>, Junsang Doh<sup>2,3</sup> and Kyung-Mi Lee<sup>1</sup>

<sup>1</sup>Global Research Lab, Department of Biochemistry and Molecular Biology, Korea University College of Medicine, Seoul 136-713, Korea

<sup>2</sup>School of Interdisciplinary Bioscience and Bioengineering (I-Bio), Pohang University of Science and Technology, Pohang, Gyeongbuk 790-784, Korea

<sup>3</sup>Department of Mechanical Engineering, Pohang University of Science and Technology, Pohang, Gyeongbuk 790-784, Korea

<sup>4</sup>Division of Integrative Biosciences and Biotechnology (IBB), Pohang University of Science and Technology, Pohang, Gyeongbuk 790-784, Korea

<sup>5</sup>Department of Pathology, University of Chicago, Chicago, IL 60637, USA

<sup>6</sup>Departments of Melanoma Medical Oncology and Immunology, MD Anderson Cancer Center Houston, TX 77054, USA

\*These authors contributed equally to this work

### *Supplementary Information*

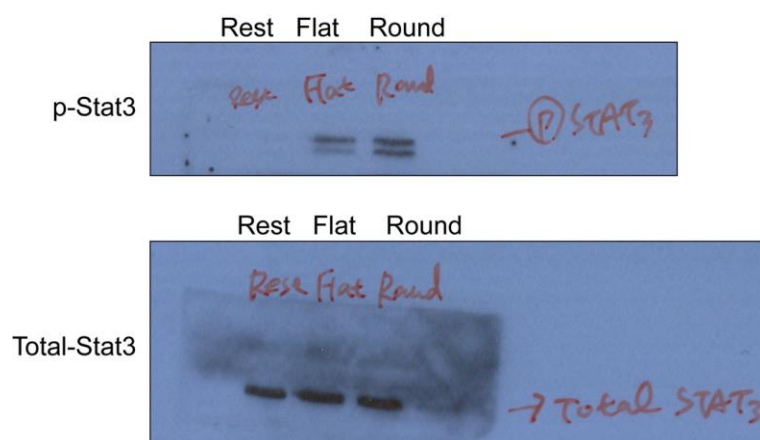

**Figure S1. Raw blot data of western blot data shown in Fig. 5b.**

Western blot analysis of NK cells cultured in round- versus flat-bottom wells using phospho-STAT3 and total-STAT3. After transfer of whole lysate proteins into the PVDF membrane, membrane was cut into 2 pieces at 55kDa; top piece was incubated with anti-mouse phospho-STAT3 (Tyr 705; 79/86 kDa) or anti-STAT3 (92 kDa, Cell Signaling Technology, Danvers, MA, USA) and the bottom piece was incubated with ERK1/2 (42/44 kDa). After incubation with HRP (Jackson ImmunoResearch Laboratories, West Grove, PA, USA), immunoreactive proteins were visualized using SuperSignal West Pico chemiluminescent substrate.
